# Supplementary material for: Coordinating effect in ring-opening polymerization of ε-caprolactone using aluminum complexes bearing bisphenolate as catalysts
Source: Royal Society of Chemistry journal article supplement (doi:10.1039/c5ra10753a), 2015-01-01
Supplement: c5ra10753a1.pdf [file c5ra10753a1.pdf]

## Coordinating Effect in Ring-opening Polymerization of $\epsilon$ -Caprolactone Using Aluminum Complexes Bearing Bisphenolate as Catalysts

Hsing-Yin Chen,<sup>a</sup> Ying-Hsien Lee,<sup>a</sup> Michael Y. Chiang,<sup>ab</sup> Wei-Yi Lu,<sup>ac</sup> Hsi-Ching Tseng, Yu-Hsieh Chen,<sup>a</sup> Yi-Chun Lai,<sup>a</sup> Chu-Chieh Lin,<sup>\*c</sup> Hsuan-Ying Chen<sup>\*a</sup>

<sup>a</sup> Department of Medicinal and Applied Chemistry, Kaohsiung Medical University, Kaohsiung, Taiwan, 80708, R.O.C.

<sup>b</sup> Department of Chemistry, National Sun Yat-sen University, Kaohsiung, Taiwan, 80424, R.O.C.

<sup>c</sup> Department of Chemistry, National Chung Hsing University, Taichung 402, Taiwan, R.O.C.

**Electronic Supplementary Information Available:** Polymer characterization data, and details of the kinetic study.

Table of Contents

|                                                                                                                  |   |
|------------------------------------------------------------------------------------------------------------------|---|
| <b>Table S1</b> Kinetic study of CL polymerization with various Al complexes in toluene 5 mL, [CL] = 2.0 M ..... | 2 |
| <b>Figure S1.</b> <sup>1</sup> H NMR spectra of <b>TriO-H</b> and <b>TriO<sub>2</sub>Al<sub>2</sub></b> .....    | 3 |

Kinetic study of CL polymerization with various Al complexes in toluene 5 mL, [CL]  
= 2.0 M at 50 °C

| Time<br>min                           | Conversion of PCL (%) |               |                |               |               |               |            |               |               |            |
|---------------------------------------|-----------------------|---------------|----------------|---------------|---------------|---------------|------------|---------------|---------------|------------|
|                                       | FCl                   | o-Br          | o-Cl           | o-OMe         | o-F           | Me            | H          | p-F           | p-OMe         | p-Br       |
| 8                                     | 34                    |               |                |               |               |               |            |               |               |            |
| 10                                    | 45                    | 23            |                | 21            | 22            | 16            | 21         | 15            | 9             | 16         |
| 14                                    | 63                    |               |                |               |               |               |            |               |               |            |
| 18                                    | 78                    |               |                |               |               |               |            |               |               |            |
| 20                                    |                       | 53            | 63             | 38            | 35            | 31            | 38         | 26            | 19            | 21         |
| 22                                    | 88                    |               |                |               |               |               |            |               |               |            |
| 30                                    | 96                    | 73            | 76             | 58            | 50            | 47            | 53         | 37            | 27            | 30         |
| 40                                    |                       | 86            | 84             | 68            | 59            | 59            | 62         | 46            | 34            | 37         |
| 50                                    |                       | 94            |                | 76            | 67            | 71            | 70         | 56            |               | 46         |
| 60                                    |                       | 97            | 90             |               | 73            | 76            | 77         | 65            | 45            | 50         |
| 70                                    |                       |               | 93             |               | 84            | 82            |            | 71            | 55            |            |
| 80                                    |                       |               | 95             |               | 90            | 87            |            | 74            |               | 61         |
| 90                                    |                       |               |                |               |               | 90            |            | 81            | 64            |            |
| 100                                   |                       |               |                |               |               |               |            | 84            |               | 67         |
| 110                                   |                       |               |                |               |               |               |            | 86            | 70            |            |
| 120                                   |                       |               |                |               |               |               |            | 90            |               |            |
| 130                                   |                       |               |                |               |               |               |            | 92            | 77            |            |
| $k_{obs}$<br>$\times 10^4$<br>(error) | 1298<br>(49)          | 659<br>(3)    | 319<br>(15)    | 304<br>(12)   | 279<br>(23)   | 270<br>(5)    | 245<br>(4) | 197<br>(5)    | 114<br>(2)    | 109<br>(2) |
| Induction<br>period <sup>1</sup>      | 6.00<br>(7)           | 8.00<br>(181) | 11.00<br>(566) | 3.00<br>(126) | 6.00<br>(418) | 6.00<br>(105) | 0          | 6.00<br>(185) | 3.00<br>(158) | 0          |

<sup>1</sup> Induction period (min): Pre-catalyst (LAlMe) must undergo a transformation to product the active catalyst (LAlOBn).

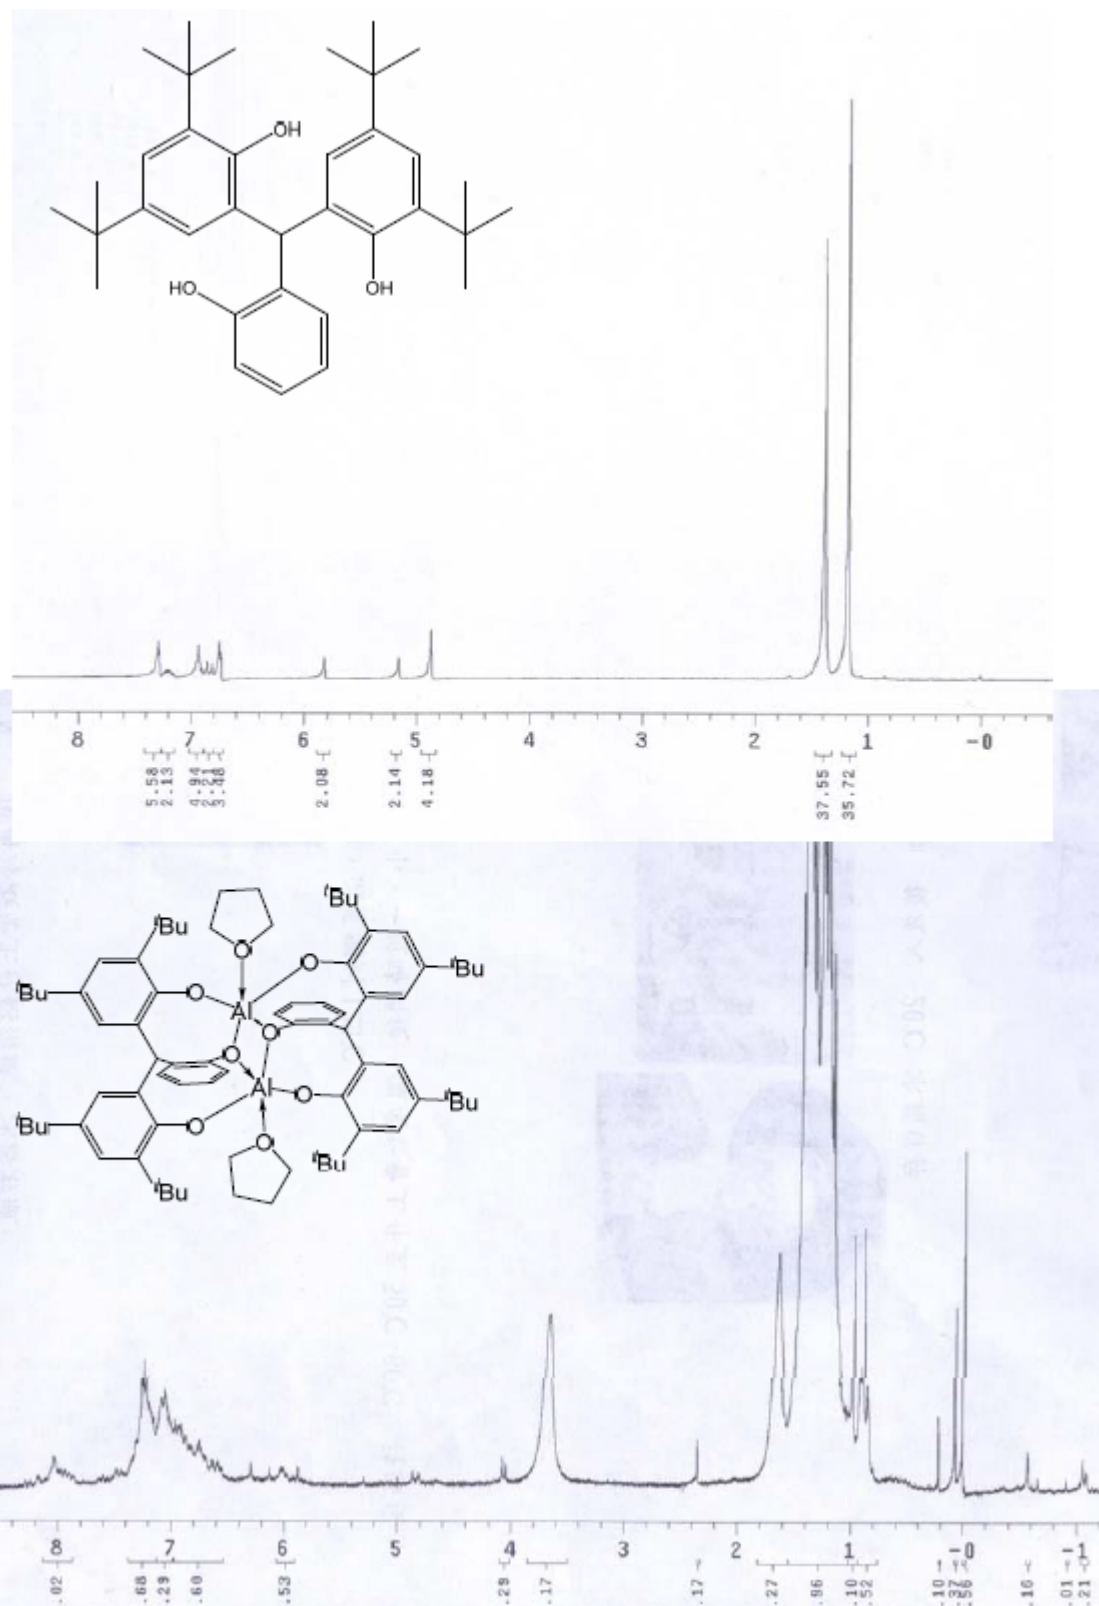

Figure S1.  $^1\text{H}$  NMR spectra of TriO-H and TriO<sub>2</sub>Al<sub>2</sub>
